# Supplementary material
Source: PubMed Central journal article supplement (PMC10112939)
Supplement: NIHMS1874164-supplement-Supplement.pdf [file NIHMS1874164-supplement-Supplement.pdf]

**Supplemental Material: The Diabetes Prevention Gap and Opportunities**

**Table A-1. Risk factors for T2DM from The National Health Interview Survey (NHIS)**

| NHIS Questionnaire items                                                                                                                                                                                                                                                                                                                                  | Variable names*       | Component score                                                                                              |
|-----------------------------------------------------------------------------------------------------------------------------------------------------------------------------------------------------------------------------------------------------------------------------------------------------------------------------------------------------------|-----------------------|--------------------------------------------------------------------------------------------------------------|
| What is your age?                                                                                                                                                                                                                                                                                                                                         | AGE                   | 0: 18-39y<br>1: 40-49y<br>2: 50-59y<br><b>3: ≥ 60y</b>                                                       |
| Are you male or female?                                                                                                                                                                                                                                                                                                                                   | SEX                   | 0: Female<br>1: Male                                                                                         |
| Has your mother, father, brother, or sister EVER been told by a doctor or other health professional that they have diabetes or sugar diabetes?                                                                                                                                                                                                            | DIADIAGFAM            | 0: No<br>1: Yes                                                                                              |
| Were you EVER told by a doctor or other health professional that you had diabetes, sugar diabetes, or gestational diabetes during pregnancy?                                                                                                                                                                                                              | DIADIAGPREG           | 0: No<br>1: Yes                                                                                              |
| Have you EVER been told by a doctor or other health professional that you had hypertension, also called high blood pressure?                                                                                                                                                                                                                              | HYP2TIME              | 0: No<br>1: Yes                                                                                              |
| How often do you do VIGOROUS leisure-time physical activities for AT LEAST 10 MINUTES that cause HEAVY sweating or LARGE increases in breathing or heart rate? How often do you do LIGHT OR MODERATE LEISURE-TIME physical activities for AT LEAST 10 MINUTES that cause ONLY LIGHT sweating or a SLIGHT to MODERATE increase in breathing or heart rate? | VIG10FWK,<br>MOD10FWK | 0: No<br>1: Never (both items)                                                                               |
| How much do you weigh without shoes? How tall are you without shoes?                                                                                                                                                                                                                                                                                      | WEIGHT, HEIGHT        | 0: BMI <25, BMI<23 if Asian<br>1: BMI>=25 BMI<30, BMI>=23 BMI<30 if Asian<br>2: BMI>=30 BMI<40<br>3: BMI>=40 |

Notes: \*Variable names are those available via the Integrated Public Use Microdata Series <https://nhis.ipums.org/nhis-action/variables/group>

Figure A-1. Testing for high blood sugar or diabetes by age

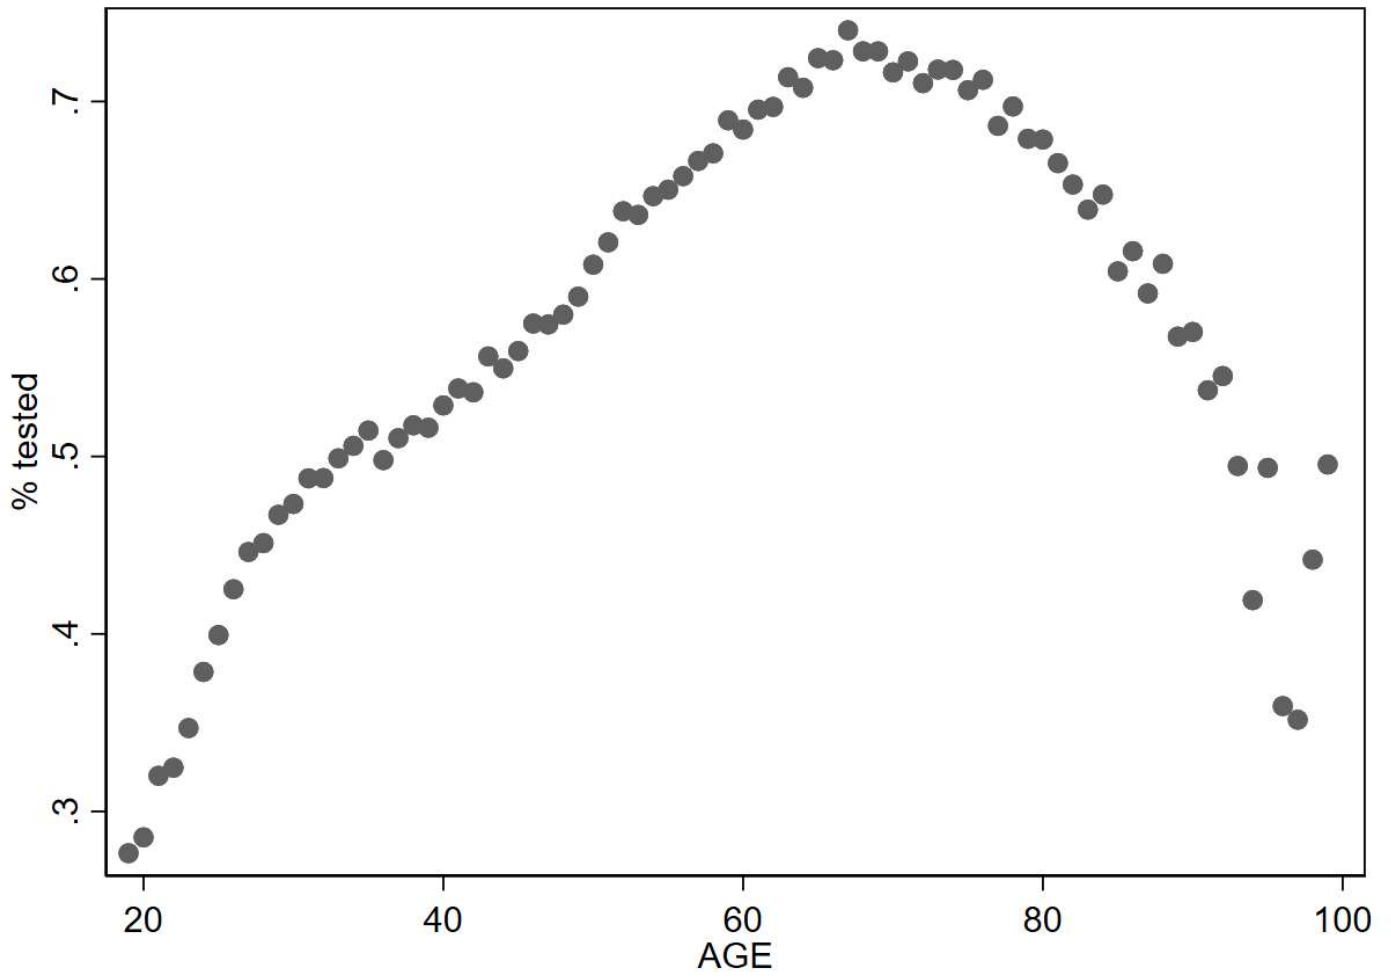

**Source:** CDC's United States Diabetes Surveillance System and Behavioral Risk Factor Surveillance System.

**Figure A-2.**

**Panel A.** Diabetes prevalence by BMI levels.

**Panel B.** BMI distribution among people diagnosed with prediabetes.

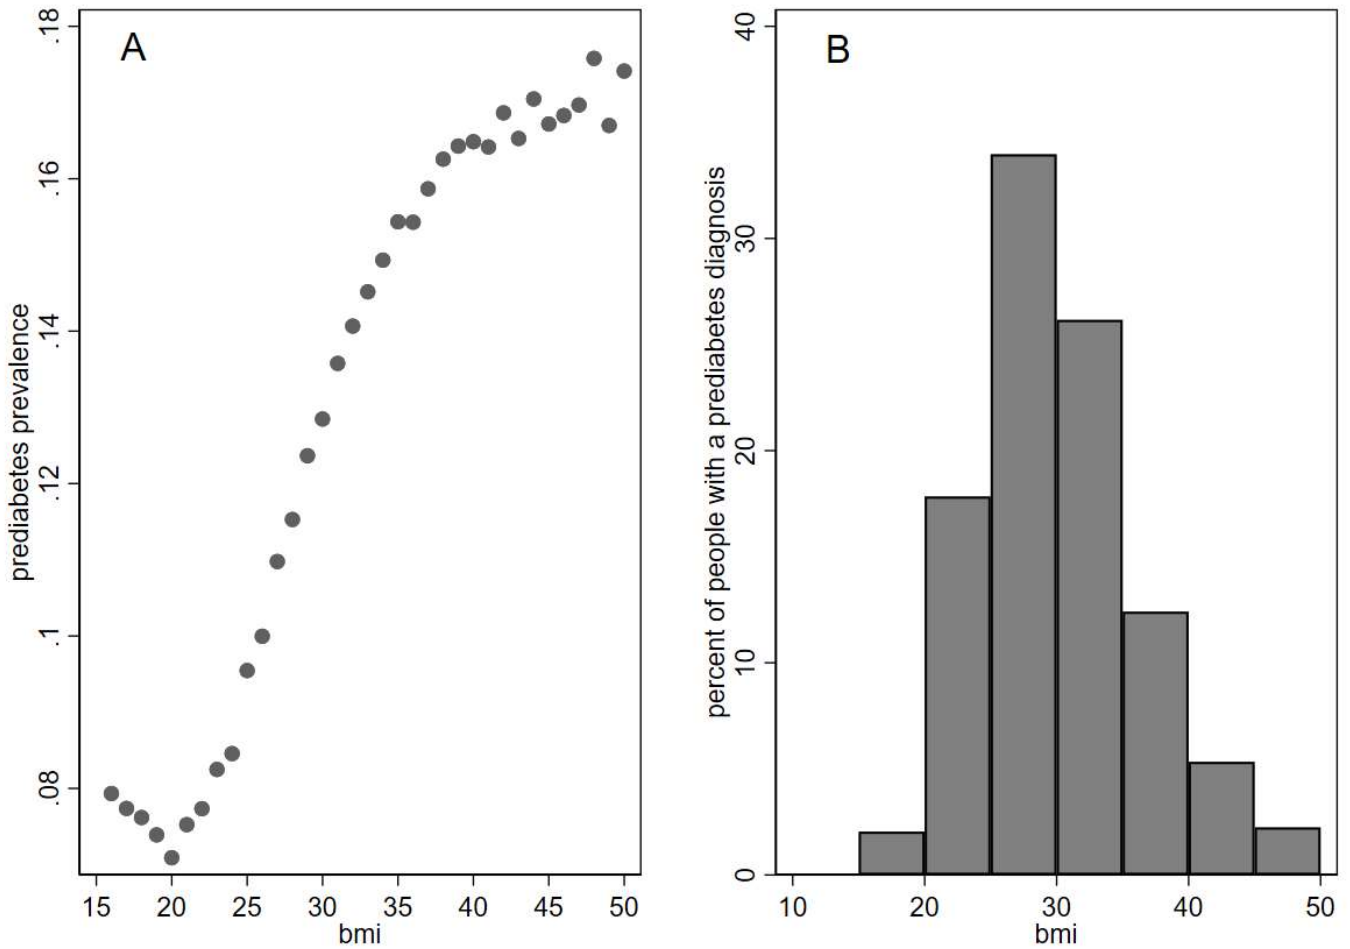

**Source:** CDC's United States Diabetes Surveillance System and Behavioral Risk Factor Surveillance System.

**Note:** Not all those with prediabetes have a BMI>25. 19.8% of those diagnoses with prediabetes are a BMI under 25.

**Table A-2. NDPP availability across states**

| State          | Number of organizations | accredited organizations (%) | organizations open to the public (%) | distance learning (%) |
|----------------|-------------------------|------------------------------|--------------------------------------|-----------------------|
| Alabama        | 34                      | 29                           | 35                                   | 29                    |
| Alaska         | 10                      | 30                           | 40                                   | 40                    |
| Arizona        | 28                      | 25                           | 39                                   | 32                    |
| Arkansas       | 17                      | 29                           | 47                                   | 12                    |
| California     | 153                     | 41                           | 40                                   | 34                    |
| Colorado       | 38                      | 42                           | 45                                   | 21                    |
| Connecticut    | 23                      | 26                           | 26                                   | 30                    |
| Delaware       | 7                       | 43                           | 29                                   | 29                    |
| D.C.           | 10                      | 20                           | 60                                   | 20                    |
| Florida        | 88                      | 39                           | 48                                   | 32                    |
| Georgia        | 70                      | 31                           | 44                                   | 20                    |
| Hawaii         | 18                      | 44                           | 50                                   | 11                    |
| Idaho          | 18                      | 44                           | 56                                   | 17                    |
| Illinois       | 67                      | 39                           | 48                                   | 22                    |
| Indiana        | 41                      | 44                           | 51                                   | 32                    |
| Iowa           | 47                      | 38                           | 55                                   | 36                    |
| Kansas         | 25                      | 36                           | 64                                   | 36                    |
| Kentucky       | 34                      | 56                           | 56                                   | 35                    |
| Louisiana      | 27                      | 15                           | 52                                   | 37                    |
| Maine          | 20                      | 50                           | 60                                   | 20                    |
| Maryland       | 119                     | 22                           | 59                                   | 50                    |
| Massachusetts  | 28                      | 36                           | 64                                   | 36                    |
| Michigan       | 59                      | 51                           | 47                                   | 27                    |
| Minnesota      | 41                      | 76                           | 61                                   | 10                    |
| Mississippi    | 32                      | 22                           | 72                                   | 19                    |
| Missouri       | 27                      | 7                            | 41                                   | 15                    |
| Montana        | 30                      | 43                           | 63                                   | 20                    |
| Nebraska       | 42                      | 45                           | 62                                   | 21                    |
| Nevada         | 14                      | 50                           | 71                                   | 14                    |
| New Hampshire  | 10                      | 60                           | 70                                   | 30                    |
| New Jersey     | 37                      | 24                           | 51                                   | 38                    |
| New Mexico     | 14                      | 36                           | 57                                   | 21                    |
| New York       | 144                     | 39                           | 55                                   | 28                    |
| North Carolina | 88                      | 49                           | 60                                   | 11                    |
| North Dakota   | 18                      | 33                           | 56                                   | 39                    |
| Ohio           | 46                      | 54                           | 54                                   | 20                    |
| Oklahoma       | 36                      | 56                           | 50                                   | 11                    |
| Oregon         | 33                      | 48                           | 67                                   | 18                    |
| Pennsylvania   | 108                     | 35                           | 54                                   | 19                    |
| Rhode Island   | 9                       | 44                           | 56                                   | 11                    |
| South Carolina | 50                      | 36                           | 56                                   | 28                    |
| South Dakota   | 16                      | 31                           | 44                                   | 44                    |
| Tennessee      | 49                      | 29                           | 41                                   | 37                    |
| Texas          | 82                      | 28                           | 50                                   | 32                    |
| Utah           | 28                      | 39                           | 46                                   | 25                    |
| Vermont        | 2                       | 50                           | 0                                    | 50                    |
| Virginia       | 54                      | 46                           | 43                                   | 31                    |
| Washington     | 25                      | 56                           | 60                                   | 12                    |
| West Virginia  | 22                      | 41                           | 59                                   | 18                    |
| Wisconsin      | 43                      | 51                           | 51                                   | 26                    |
| Wyoming        | 17                      | 18                           | 35                                   | 18                    |

**Source:** NDPP <https://dprp.cdc.gov/Registry>.

**Table A-3. The Medicare Diabetes Prevention Program by state**

| State                       | MDPP suppliers* | Prevalence (Diagnosed) of prediabetes 65+ (%) ** | Total population 65+ (1,000s) *** |
|-----------------------------|-----------------|--------------------------------------------------|-----------------------------------|
| Alabama <sup>a</sup>        | 10              | 11.4                                             | 874                               |
| Alaska <sup>a</sup>         | 2               | 16.5                                             | 96                                |
| Arizona <sup>a</sup>        | 2               | 16.7                                             | 1,374                             |
| Arkansas <sup>d</sup>       | 7               | 7.4                                              | 536                               |
| California <sup>a</sup>     | 64              | 19.5                                             | 5,976                             |
| Colorado <sup>a</sup>       | 40              | 16.3                                             | 876                               |
| Conneticut <sup>a</sup>     | 1               | 13.8                                             | 646                               |
| Delaware <sup>a</sup>       | 15              | 15.5                                             | 198                               |
| D.C. <sup>b</sup>           | 1               | 15.5                                             | 86                                |
| Florida <sup>a</sup>        | 45              | 13.0                                             | 4,638                             |
| Georgia <sup>a</sup>        | 3               | 15.4                                             | 1,575                             |
| Hawaii <sup>a</sup>         | 13              | 26.4                                             | 275                               |
| Idaho <sup>a</sup>          | 25              | 13.8                                             | 306                               |
| Illinois <sup>a</sup>       | 18              | 12.1                                             | 2,089                             |
| Indiana <sup>a</sup>        | 22              | 14.7                                             | 1,115                             |
| Iowa <sup>a</sup>           | 33              | 13.0                                             | 566                               |
| Kansas <sup>a</sup>         | 7               | 11.4                                             | 488                               |
| Kentucky <sup>a</sup>       | 6               | 12.4                                             | 771                               |
| Louisiana <sup>d</sup>      | 2               | 11.1                                             | 764                               |
| Maine <sup>a</sup>          | 8               | 14.0                                             | 294                               |
| Maryland <sup>a</sup>       | 30              | 18.0                                             | 987                               |
| Massachusetts <sup>a</sup>  | 25              | 15.6                                             | 1,198                             |
| Michigan <sup>a</sup>       | 180             | 14.1                                             | 1,812                             |
| Minnesota <sup>a</sup>      | 4               | 15.8                                             | 949                               |
| Mississippi <sup>a</sup>    | 3               | 10.8                                             | 500                               |
| Missouri <sup>a</sup>       | 4               | 12.8                                             | 1,090                             |
| Montana <sup>a</sup>        | 9               | 11.5                                             | 213                               |
| Nebraska <sup>a</sup>       | 4               | 11.4                                             | 319                               |
| Nevada <sup>a</sup>         | 0               | 17.9                                             | 519                               |
| New Hampshire <sup>a</sup>  | 5               | 13.9                                             | 263                               |
| New Jersey <sup>a</sup>     | 6               | 14.9                                             | 1,510                             |
| New Mexico <sup>a</sup>     | 1               | 18.1                                             | 390                               |
| New York <sup>a</sup>       | 33              | 14.6                                             | 3,370                             |
| North Carolina <sup>b</sup> | 16              | 13.8                                             | 1,815                             |
| North Dakota <sup>a</sup>   | 5               | 15.3                                             | 123                               |
| Ohio <sup>a</sup>           | 68              | 13.3                                             | 2,098                             |
| Oklahoma <sup>a</sup>       | 7               | 13.9                                             | 653                               |
| Oregon <sup>a</sup>         | 68              | 17.2                                             | 790                               |
| Pennsylvania <sup>a</sup>   | 38              | 13.8                                             | 2,448                             |
| Rhode Island <sup>d</sup>   | 0               | 10.4                                             | 192                               |
| South Carolina <sup>c</sup> | 11              | 12.0                                             | 976                               |
| South Dakota <sup>b</sup>   | 0               | 12.1                                             | 157                               |
| Tennessee <sup>b</sup>      | 18              | 11                                               | 1,181                             |
| Texas <sup>b</sup>          | 12              | 13.8                                             | 3,874                             |
| Utah <sup>a</sup>           | 18              | 16.2                                             | 382                               |
| Vermont <sup>b</sup>        | 0               | 11.9                                             | 129                               |
| Virginia <sup>a</sup>       | 6               | 13.4                                             | 1,401                             |
| Washington <sup>b</sup>     | 25              | 13.3                                             | 1,248                             |
| West Virginia <sup>a</sup>  | 12              | 11.0                                             | 374                               |
| Wisconsin <sup>a</sup>      | 6               | 14.7                                             | 1,048                             |
| Wyoming <sup>a</sup>        | 2               | 12.6                                             | 104                               |

**Sources:**

\* Medicare Diabetes Prevention Program, <https://data.cms.gov/cms-innovation-center-programs/alternative-payments-medicare-diabetes-prevention-program/medicare-diabetes-prevention-program>

\*\* CDC's United States Diabetes Surveillance System and Behavioral Risk Factor Surveillance System (BRFSS). Data is not available annually for all states. Letters represent the latest available year:

<sup>a</sup> Data from 40 states are from 2020.

<sup>b</sup> Data from 7 states are from 2019.

<sup>c</sup> Data from 1 states are from 2018.

<sup>d</sup> Data from 3 states are from 2017.

Based on the state and year we have used different sample weights, `_LLCPWT`, `_LCPWTV1`, `_LCPWTV2`, `_LCPWTV3`, as recommended by BRFSS.

\*\*\*U.S. Census Bureau, 2020: <https://www.census.gov/programs-surveys/popest/data/tables.html>

Table A-4. Overview of Medicaid DPP Eligibility Criteria and Reimbursement for approved states

| States                  | Maximum reimbursement amount* | Reimbursement rate                                                                                                                                                                | Eligibility Criteria*                                                                                                                                                                                                   |
|-------------------------|-------------------------------|-----------------------------------------------------------------------------------------------------------------------------------------------------------------------------------|-------------------------------------------------------------------------------------------------------------------------------------------------------------------------------------------------------------------------|
| California <sup>a</sup> | \$536 (2-year total)          | Core Sessions Months 1-6:<br>(G9873) 1st session attended - \$20<br>(G9874) 4 sessions attended - \$40<br>(G9875) 9 sessions attended - \$72                                      |                                                                                                                                                                                                                         |
| Delaware <sup>b</sup>   |                               |                                                                                                                                                                                   | Medicaid members who have been referred through a physician referral or self-referral.                                                                                                                                  |
| Illinois <sup>b</sup>   | \$670                         |                                                                                                                                                                                   | Medicaid members who are overweight and have elevated blood glucose level or history of gestational diabetes; referral is not required.                                                                                 |
| Kentucky <sup>b</sup>   |                               |                                                                                                                                                                                   | Online questionnaire based on CDC risk screener (does not require A1C).                                                                                                                                                 |
| Maryland <sup>a</sup>   | \$670                         | (G9873) Session 1, 1st core session attended: \$100<br>(G9874) Sessions 2-4, 4 total core sessions attended: \$120<br>(G9875) Sessions 5-9, 9 total core sessions attended: \$140 | Medicaid beneficiaries must receive services through a HealthChoice MCO, be between 18-64 years old, be overweight or obese, and have an elevated blood glucose level OR history of gestational diabetes mellitus (GDM) |
| Michigan <sup>b</sup>   | \$1000                        |                                                                                                                                                                                   |                                                                                                                                                                                                                         |
| Minnesota <sup>a</sup>  | \$300                         | \$13.62 per hour per beneficiary, approximately \$300 for 22 sessions                                                                                                             | Medicaid beneficiaries must have a diagnosis of prediabetes by a qualified physician.                                                                                                                                   |
| Missouri <sup>b</sup>   | \$577                         |                                                                                                                                                                                   | Services require a referral or prescription from a physician or other licensed practitioner.                                                                                                                            |
| Montana <sup>a</sup>    | \$640                         | \$29.10 per individual per group session (for both in-person visits and those offered via telehealth)                                                                             | Self-referral with physician approval before starting the program.                                                                                                                                                      |

|                             |                                                                 |                                                                                                           |                                                                                                                                                                                       |
|-----------------------------|-----------------------------------------------------------------|-----------------------------------------------------------------------------------------------------------|---------------------------------------------------------------------------------------------------------------------------------------------------------------------------------------|
| New York <sup>a</sup>       | \$554                                                           | \$22.00 per-member, per-session reimbursement<br>\$70.00 incentive payment - 5% weight loss from baseline | A referral must be written by a physician, physician assistant (PA), nurse practitioner, or midwife to participate in the National DPP.                                               |
| Oregon <sup>a</sup>         | \$1,196 (2-year total in-person), \$1,176 (2-year total online) | In-person/ Distance Learning: \$23 per session.<br>Online: \$49 per 30-day period                         | Blood test required (only for those without an overweight or obese diagnosis).                                                                                                        |
| Pennsylvania <sup>a,b</sup> | MCOs determine reimbursement rate                               |                                                                                                           | Medicaid beneficiaries may need to have a referral from a physician to be eligible for the National DPP lifestyle change program. Each MCO determines whether a referral is required. |
| Virginia <sup>b</sup>       | MCOs determine reimbursement rate                               |                                                                                                           |                                                                                                                                                                                       |
| Wyoming <sup>a</sup>        | \$418                                                           | \$19.00/session (core and maintenance)<br>\$418 for 22 sessions                                           | Allowing individuals under 18 years of age to participate. Participants must meet pre-diabetes criteria. Blood test required.                                                         |

**Sources:**

<sup>a</sup> [Reimbursement Models for Medicaid Agencies and MCOs - National DPP Coverage Toolkit](#)

<sup>b</sup> <https://coveragetoolkit.org/participating-payers/>

\* <https://coveragetoolkit.org/participating-payers/>



**Table A-5. Interventions for T2DM prevention**

| Intervention                                          | Description                                                                                                                                                                                                                                                                                                                                                                                                                                                                                                                                                                                                                                                                          |
|-------------------------------------------------------|--------------------------------------------------------------------------------------------------------------------------------------------------------------------------------------------------------------------------------------------------------------------------------------------------------------------------------------------------------------------------------------------------------------------------------------------------------------------------------------------------------------------------------------------------------------------------------------------------------------------------------------------------------------------------------------|
| <b>The National Diabetes Prevention Program (DPP)</b> | Congress authorized the CDC to establish and lead the National DPP in 2010. The programs are an adaptation of the 2002 NIH-funded DPP trial. It aims for participants to achieve a weight loss equivalent to 5-7% of baseline body weight via moderate changes in diet and physical activity, emphasizing self-efficacy and social support in overcoming common challenges to sustaining weight loss and behavioral changes. The program comprises 16 core classes throughout 4 to 6 months, followed by monthly maintenance sessions in months 7-12. The year-long program is taught by a trained and accredited lifestyle coach.                                                   |
| <b>Medical Nutrition Therapy</b>                      | MNT is a nutritional diagnostic, therapy, and counseling service for disease management, administered by a registered dietitian or nutrition professional <sup>1</sup> . The intervention consists in teaching the patient to plan meals and carbohydrate intake using tools like the diabetes plate model. Individualization is a key characteristic of the program. A 60 minutes initial visit can be followed up by shorter one-to-one meetings.                                                                                                                                                                                                                                  |
| <b>Metformin</b>                                      | Metformin has been considered the first line oral medication for T2DM since the 1990s. Large randomized clinical trials, including the DPP, have shown that metformin can also reduce risk of T2DM. Metformin has also been shown to be safe, tolerable and lead to cost-savings when used for diabetes prevention. Although metformin does not have an FDA indication for prediabetes or diabetes prevention, national care guidelines include metformin as one of the evidence-based options for T2DM prevention, especially for adults who are younger than age 60, have BMI $\geq$ 35, fasting plasma glucose $\geq$ 110 mg/dL and women with a history of gestational diabetes. |
| <b>Pioglitazone</b>                                   | Pioglitazone belongs to the thiazolidinedione class of T2DM medications which help increase insulin sensitivity. However, pioglitazone and other TZDs are much less commonly prescribed for T2DM given worrisome side effects including weight gain, heart failure, and fractures. While several studies have shown that pioglitazone can reduce risk of incident T2DM, it is generally not recommended for prediabetes or diabetes prevention because of safety concerns.                                                                                                                                                                                                           |
| <b>Phentermine/Topiramate</b>                         | Phentermine/topiramate was approved by the FDA for weight loss in 2012 and is usually considered for patients with BMI $\geq$ 27 kg/m <sup>2</sup> and one weight-related                                                                                                                                                                                                                                                                                                                                                                                                                                                                                                            |

<sup>1</sup> U.S. Department of Health and Human Services: Final MNT regulations. CMS-1169-FC. Federal Register, 1 November 2001. 42 CFR Parts 405, 410, 411, 414, and 415.

|  |                                                                                                                                                                                                                                                                                  |
|--|----------------------------------------------------------------------------------------------------------------------------------------------------------------------------------------------------------------------------------------------------------------------------------|
|  | <p>condition. It is a controlled substance that has cardiac risk and can be teratogenic. Studies have shown that phentermine/topiramate is an effective weight loss drug and can reduce risk of T2DM. However, it is generally not used for T2DM because of safety concerns.</p> |
|--|----------------------------------------------------------------------------------------------------------------------------------------------------------------------------------------------------------------------------------------------------------------------------------|

**Table A-6. Effects on weight loss and fasting blood glucose by race among US studies that translated the Diabetes Prevention Program (N=33 for weight; N=15 for fasting blood glucose).**

| Race/<br>Ethnicity                                  | Characteris<br>tics                 | Baseline<br>weight<br>(kg(SD)) | Weight<br>change<br>in kg<br>[95%<br>CI] | % body<br>weight<br>lost [95%<br>CI] | FBG<br>change in<br>mg/dL<br>[95% CI] |
|-----------------------------------------------------|-------------------------------------|--------------------------------|------------------------------------------|--------------------------------------|---------------------------------------|
| African<br>American <sup>1-6</sup><br>(N=237)       | mean age 52<br>years, 77%<br>female | 95.4<br>(4.8)                  | -1.6 [-<br>2.7; -<br>0.6]                | -1.7<br>[-2.7; -<br>0.7]             | -7.8<br>[-8.3; -<br>7.3]              |
| Asian<br>American <sup>7-9</sup><br>(N=172)         | mean age 51<br>years, 75%<br>female | 75.5<br>(14.4)                 | -2.0 [-<br>3.7; -<br>0.3]                | -2.5<br>[-4.2; -<br>0.8]             | No data                               |
| Indigenous <sup>10-11</sup><br>(N=1,525)            | mean age 42<br>years, 79%<br>female | 97.8<br>(1.6)                  | -4.0 [-<br>7.1; -<br>1.0]                | -4.1<br>[-7.3; -<br>0.9]             | -1.7<br>[-4.1;<br>0.8]                |
| Hispanic <sup>12-18</sup><br>(N=529)                | mean age 44<br>years, 88%<br>female | 81.7<br>(7.8)                  | -1.9 [-<br>3.4; -<br>0.5]                | -2.1<br>[-3.8; -<br>0.3]             | -1.2<br>[-2.8;<br>0.4]                |
| Non-Hispanic<br>White <sup>19-33</sup><br>(N=2,718) | mean age 52<br>years, 76%<br>female | 96.6<br>(14.3)                 | -5.5 [-<br>6.2; -<br>4.7]                | -5.7<br>[-6.3; -<br>5.0]             | -2.3<br>[-5.7;<br>1.0]                |

#### References

1. Boltri JM, Davis-Smith YM, Seale JP, Shellenberger S, Okosun IS, Cornelius ME. Diabetes prevention in a faith-based setting: results of translational research. *J Public Health Manag Pract* 2008;14:29-32
2. Boltri JM, Davis-Smith M, Okosun IS, Seale JP, Foster B. Translation of the National Institutes of Health Diabetes Prevention Program in African American churches. *J Natl Med Assoc* 2011;103:194-202
3. Davis-Smith YM, Boltri JM, Seale JP, Shellenberger S, Blalock T, Tobin B. Implementing a diabetes prevention program in a rural African-American church. *J Natl Med Assoc* 2007;99:440-446
4. Faghri PD, Li R. Effectiveness of Financial Incentives in a Worksite Diabetes Prevention Program. *Open Obes J* 2014;6:1-12
5. Faridi Z, Shuval K, Njike VY, Katz JA, Jennings G, Williams M, Katz DL. Partners reducing effects of diabetes (PREDICT): a diabetes prevention physical activity and dietary intervention through African-American churches. *Health Educ Res* 2010;25:306-315
6. Yeary KH, Cornell CE, Turner J, Moore P, Bursac Z, Prewitt TE, West DS. Feasibility of an evidence-based weight loss intervention for a faith-based, rural, African American population. *Prev Chronic Dis* 2011;8:A146.
7. Islam NS, Zanolwiak JM, Wyatt LC, Chun K, Lee L, Kwon SC, Trinh-Shevrin C. A randomized-controlled, pilot intervention on diabetes prevention and healthy lifestyles in the New York City Korean community. *J Community Health* 2013;38:1030-1041

8. Islam NS, Zanowiak JM, Wyatt LC, Kavathe R, Singh H, Kwon SC, Trinh-Shevrin C. Diabetes prevention in the New York City Sikh Asian Indian community: a pilot study. *Int J Environ Res Public Health* 2014;11:5462-5486
9. Jaber LA, Pinelli NR, Brown MB, Funnell MM, Anderson R, Hammad A, Herman WH. Feasibility of group lifestyle intervention for diabetes prevention in Arab Americans. *Diabetes Res Clin Pract* 2011;91:307-315.
10. Benyshek DC, Chino M, Dodge-Francis C, Begay TO, Jin H, Giordano C. Prevention of type 2 diabetes in urban American Indian/Alaskan Native communities: The Life in BALANCE pilot study. *J Diabetes Mellitus* 2013;3:184-191
11. Jiang L, Manson SM, Beals J, Henderson WG, Huang H, Acton KJ, Roubideaux Y. Translating the Diabetes Prevention Program into American Indian and Alaska Native communities: results from the Special Diabetes Program for Indians Diabetes Prevention demonstration project. *Diabetes Care* 2013;36:2027-2034
12. Kanaya AM, Santoyo-Olsson J, Gregorich S, Grossman M, Moore T, Stewart AL. The Live Well, Be Well study: a community-based, translational lifestyle program to lower diabetes risk factors in ethnic minority and lower-socioeconomic status adults. *Am J Public Health* 2012;102:1551-1558
13. Kramer MK, Perez-Cepak y, Venditti EM, Kriska AM. Evaluation of the Group Lifestyle Balance programme for diabetes prevention in a Hispanic Women, Infants and Children (WIC) Programme population in the USA. *Diversity and Equality in Health and Care* 2013;10:73-82
14. Ockene IS, Tellez TL, Rosal MC, Reed GW, Mordes J, Merriam PA, Olendzki BC, Handelman G, Nicolosi R, Ma Y. Outcomes of a Latino community-based intervention for the prevention of diabetes: the Lawrence Latino Diabetes Prevention Project. *Am J Public Health* 2012;102:336-342
15. Philis-Tsimikas A, Fortmann AL, Dharkar-Surber S, Euyoque JA, Ruiz M, Schultz J, Gallo LC. Dulce Mothers: an intervention to reduce diabetes and cardiovascular risk in Latinas after gestational diabetes. *Transl Behav Med* 2014;4:18-25
16. Ruggiero L, Oros S, Choi YK. Community-based translation of the diabetes prevention program's lifestyle intervention in an underserved Latino population. *Diabetes Educ* 2011;37:564-572
17. Vincent D, McEwen MM, Hepworth JT, Stump CS. The effects of a community-based, culturally tailored diabetes prevention intervention for high-risk adults of Mexican descent. *Diabetes Educ* 2014;40:202-213
18. O'Brien MJ, Perez A, Scanlan AB, Alos VA, Whitaker RC, Foster GD, Ackermann RT, Ciolino JD, Homko C. PREVENT-DM Comparative Effectiveness Trial of Lifestyle Intervention and Metformin. *Am J Prev Med*. 2017 Jun;52(6):788-797. doi: 10.1016/j.amepre.2017.01.008. Epub 2017 Feb 22. PMID: 28237635; PMCID: PMC5438762.
19. Ackermann RT, Finch EA, Brizendine E, Zhou H, Marrero DG. Translating the Diabetes Prevention Program into the community. The DEPLOY Pilot Study. *Am J Prev Med* 2008;35:357-363
20. Ackermann RT, Sandy LG, Beauregard T, Coblitz M, Norton KL, Vojta D. A randomized comparative effectiveness trial of using cable television to deliver diabetes prevention programming. *Obesity* 2014;22:1601-1607.
21. Guyse LA, McHugh BR, Meszaros JF, Vanderwood KK, Hall TO, Arave D, Butcher MK, Helgerson SD, Harwell TS. Collaborative Approach to Implementing an Adapted Diabetes Prevention Program Lifestyle Intervention. *Diabetes Spectr* 2011;24:138
22. Katula JA, Vitolins MZ, Rosenberger EL, Blackwell CS, Morgan TM, Lawlor MS, Goff DC, Jr. One-year results of a community-based translation of the Diabetes Prevention Program: Healthy-Living Partnerships to Prevent Diabetes (HELP PD) Project. *Diabetes Care* 2011;34:1451-1457
23. Kramer MK, Kriska AM, Venditti EM, Miller RG, Brooks MM, Burke LE, Siminerio LM, Solano FX, Orchard TJ. Translating the Diabetes Prevention Program: a comprehensive model for prevention training and program delivery. *Am J Prev Med* 2009;37:505-511

24. Kramer MK, Miller RG, Siminerio LM. Evaluation of a community Diabetes Prevention Program delivered by diabetes educators in the United States: one-year follow up. *Diabetes Res Clin Pract* 2014;106:e49-52
25. Ma J, Yank V, Xiao L, Lavori PW, Wilson SR, Rosas LG, Stafford RS. Translating the Diabetes Prevention Program lifestyle intervention for weight loss into primary care: a randomized trial. *JAMA Intern Med* 2013;173:113-121
26. Pagoto SL, Kantor L, Bodenlos JS, Gitkind M, Ma Y. Translating the diabetes prevention program into a hospital-based weight loss program. *Health Psychol* 2008;27:S91-98
27. Piatt GA, Seidel MC, Powell RO, Zgibor JC. Comparative effectiveness of lifestyle intervention efforts in the community: results of the Rethinking Eating and ACTivity (REACT) study. *Diabetes Care* 2013;36:202-209
28. Seidel MC, Powell RO, Zgibor JC, Siminerio LM, Piatt GA. Translating the Diabetes Prevention Program into an urban medically underserved community: a nonrandomized prospective intervention study. *Diabetes Care* 2008;31:684-689
29. Sepah SC, Jiang L, Peters AL. Translating the Diabetes Prevention Program into an Online Social Network: Validation against CDC Standards. *Diabetes Educ* 2014;40:435-443
30. Vadheim LM, Brewer KA, Kassner DR, Vanderwood KK, Hall TO, Butcher MK, Helgerson SD, Harwell TS. Effectiveness of a lifestyle intervention program among persons at high risk for cardiovascular disease and diabetes in a rural community. *J Rural Health* 2010;26:266-272
31. Vadheim LM, McPherson C, Kassner DR, Vanderwood KK, Hall TO, Butcher MK, Helgerson SD, Harwell TS. Adapted diabetes prevention program lifestyle intervention can be effectively delivered through telehealth. *Diabetes Educ* 2010;36:651-656
32. Vanderwood KK, Hall TO, Harwell TS, Butcher MK, Helgerson SD. Implementing a state-based cardiovascular disease and diabetes prevention program. *Diabetes Care* 2010;33:2543-2545
33. Whittemore R, Melkus G, Wagner J, Dziura J, Northrup V, Grey M. Translating the diabetes prevention program to primary care: a pilot study. *Nurs Res* 2009;58:2-12
